# Supplementary material for: Activation of intestinal olfactory receptor stimulates glucagon-like peptide-1 secretion in enteroendocrine cells and attenuates hyperglycemia in type 2 diabetic mice
Source: PubMed Central journal article supplement (PMC5656655; doi:10.1038/s41598-017-14086-5), 2017-10-25
Supplement: 41598_2017_14086_MOESM1_ESM.pdf [file 41598_2017_14086_MOESM1_ESM.pdf]

Activation of intestinal olfactory receptor stimulates glucagon-like peptide-1 secretion in enteroendocrine cells and attenuates hyperglycemia in type 2 diabetic mice.

Ki-Suk Kim<sup>1</sup>, In-Seung Lee<sup>1</sup>, Kang-Hoon Kim<sup>1</sup>, Jiyoung Park<sup>1</sup>, Yumi Kim<sup>1</sup>, Jeong-Hee Choi<sup>2</sup>, Jin-Sung Choi<sup>2</sup>, and Hyeung-Jin Jang<sup>1,\*</sup>

<sup>1</sup>Department of Biochemistry, College of Korean Medicine, Kyung Hee University, 26, Kyungheedaero, Dongdaemun-gu, Seoul, 02447, Republic of Korea

<sup>2</sup>College of Pharmacy, The Catholic University of Korea, Bucheon, Gyeonggi-do, 14662, South Korea

\*Correspondence and requests for materials should be addressed to H.-J.J. (email: [hjjang@khu.ac.kr](mailto:hjjang@khu.ac.kr))

### Supplementary Table S1. Sequence information for siRNA duplexes.

| Gene         | Forward                    | Reverse                     |
|--------------|----------------------------|-----------------------------|
| <i>OR1A1</i> | CUGAUGUUCGCCUUCACAA (dTdT) | UUGUGAAGGCGAACAUUCAG (dTdT) |
| <i>ORIG1</i> | CUCCUACUCAGGGUGUCUA (dTdT) | UAGACACCCUGAGUAGGAG (dTdT)  |
| <i>GNAL</i>  | CGGACCAUUUCUAUCAUCU (dTdT) | AGAUGAUAGAAAUGGUCCG (dTdT)  |
| <i>CNGA2</i> | GACUUGGGAUAAAUCGUGU (dTdT) | ACACGAUUUAUCCCAAGUC (dTdT)  |
| <i>GNAT3</i> | CGAGUGAAAACGACUGGAA (dTdT) | UCCAGUCGUUUUCACUCG (dTdT)   |

The product name of each siRNAs: *OR1A1* siRNA, 118058 duplex; *ORIG1* siRNA, 1108121 duplex; *GNAL* siRNA, 10630000 duplex; *CNGA2* siRNA, 1033221 duplex; *GNAT3* siRNA, 1175215 duplex.

### Supplementary Table S2. Sequence information for real-time PCR primers.

| Gene         | Forward                | Reverse                   |
|--------------|------------------------|---------------------------|
| <i>GAPDH</i> | GCCACATCGCTCAGACACC    | CCCAATACGACCAAATCCGT      |
| <i>GNAT3</i> | CTATGACATGGTCCTCGTGGAA | GATACTGTTGAACAGGTGAAGGCTT |
| <i>OR1A1</i> | TCAGCCGCCCACTTCACT     | CCAGCAATAAGCCAGATACAAGAC  |
| <i>ORIG1</i> | CCCTGGGCTCTGCATCTTC    | AGGGAGTGGAGGGCATTCA       |
| <i>GNAL</i>  | CCGGGCTCAAGGGATTCT     | AAATTAGCCAAGCATGGTAGCAA   |
| <i>CNGA2</i> | GCTGGTGCTGGATTATGTCTCA | TGCGCAATCGGATGAAGAG       |

Supplementary Figure and legends

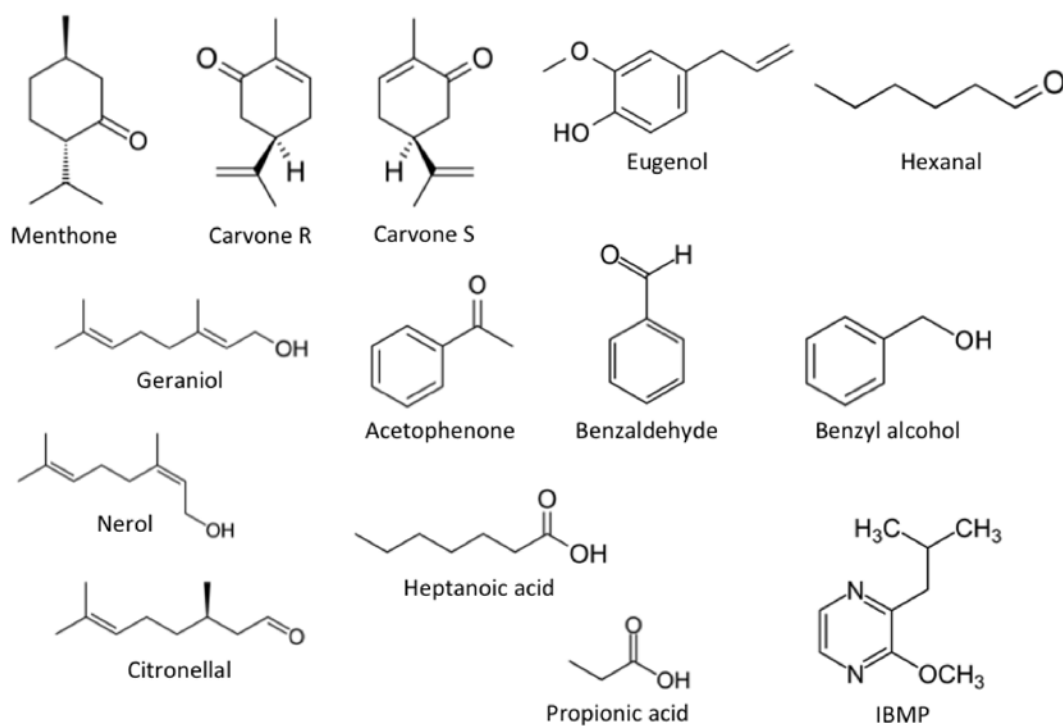

**Supplementary Fig. S1.** Chemical structure of odorants.

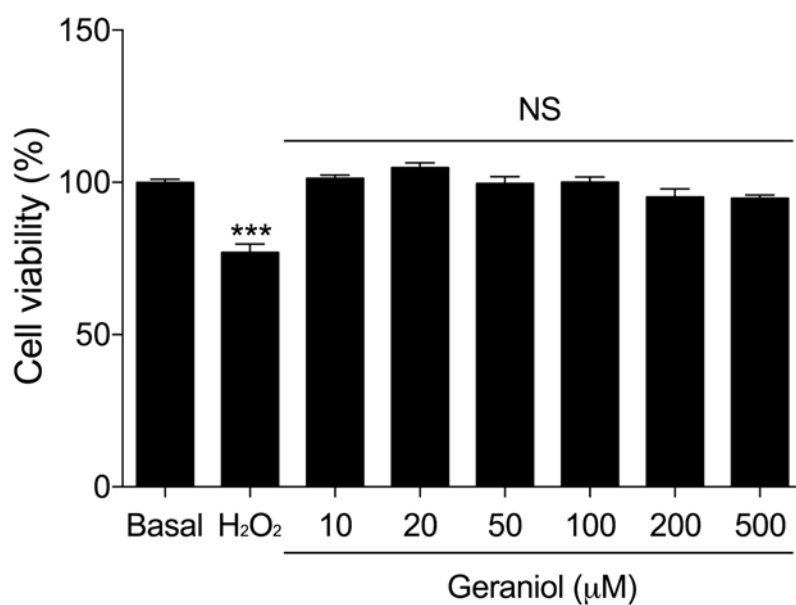

**Supplementary Fig. S2.** Cell viability assay using geraniol. Error bars show SEM. Statistics, ANOVA followed by Dunnett's post-hoc. \*\*\* $p < 0.001$ . H<sub>2</sub>O<sub>2</sub>, hydrogen peroxide. NS, non-significant.

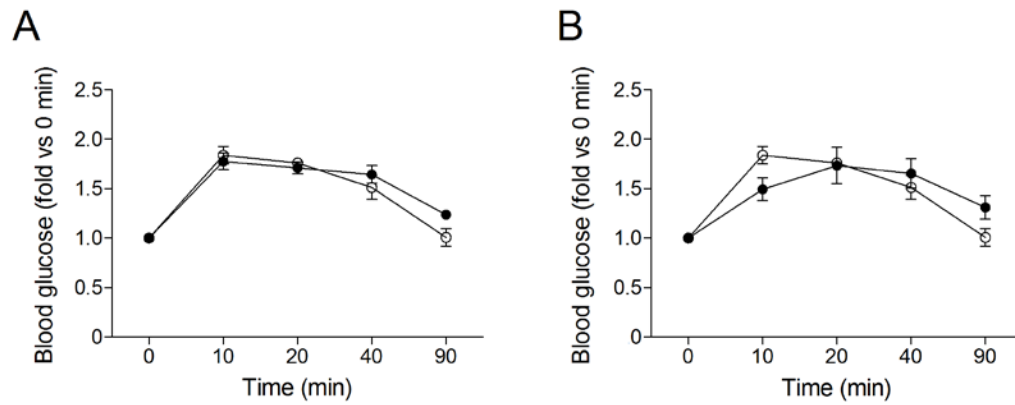

**Supplementary Fig. S3.** Effects of lower doses of geraniol (a, 2 mmol/kg; b, 0.7 mmol/kg) on blood glucose levels of the *db/db* mice during OGTT (2 g/kg).  $n=4-7$ . Error bars show SEM.
